# Supplementary figures and images for: A Random Reversible Watermarking Schefme for Relational Data
Source: Research Square preprint supplement (doi:10.21203/rs.3.rs-1542828/v2), 2022-05-02

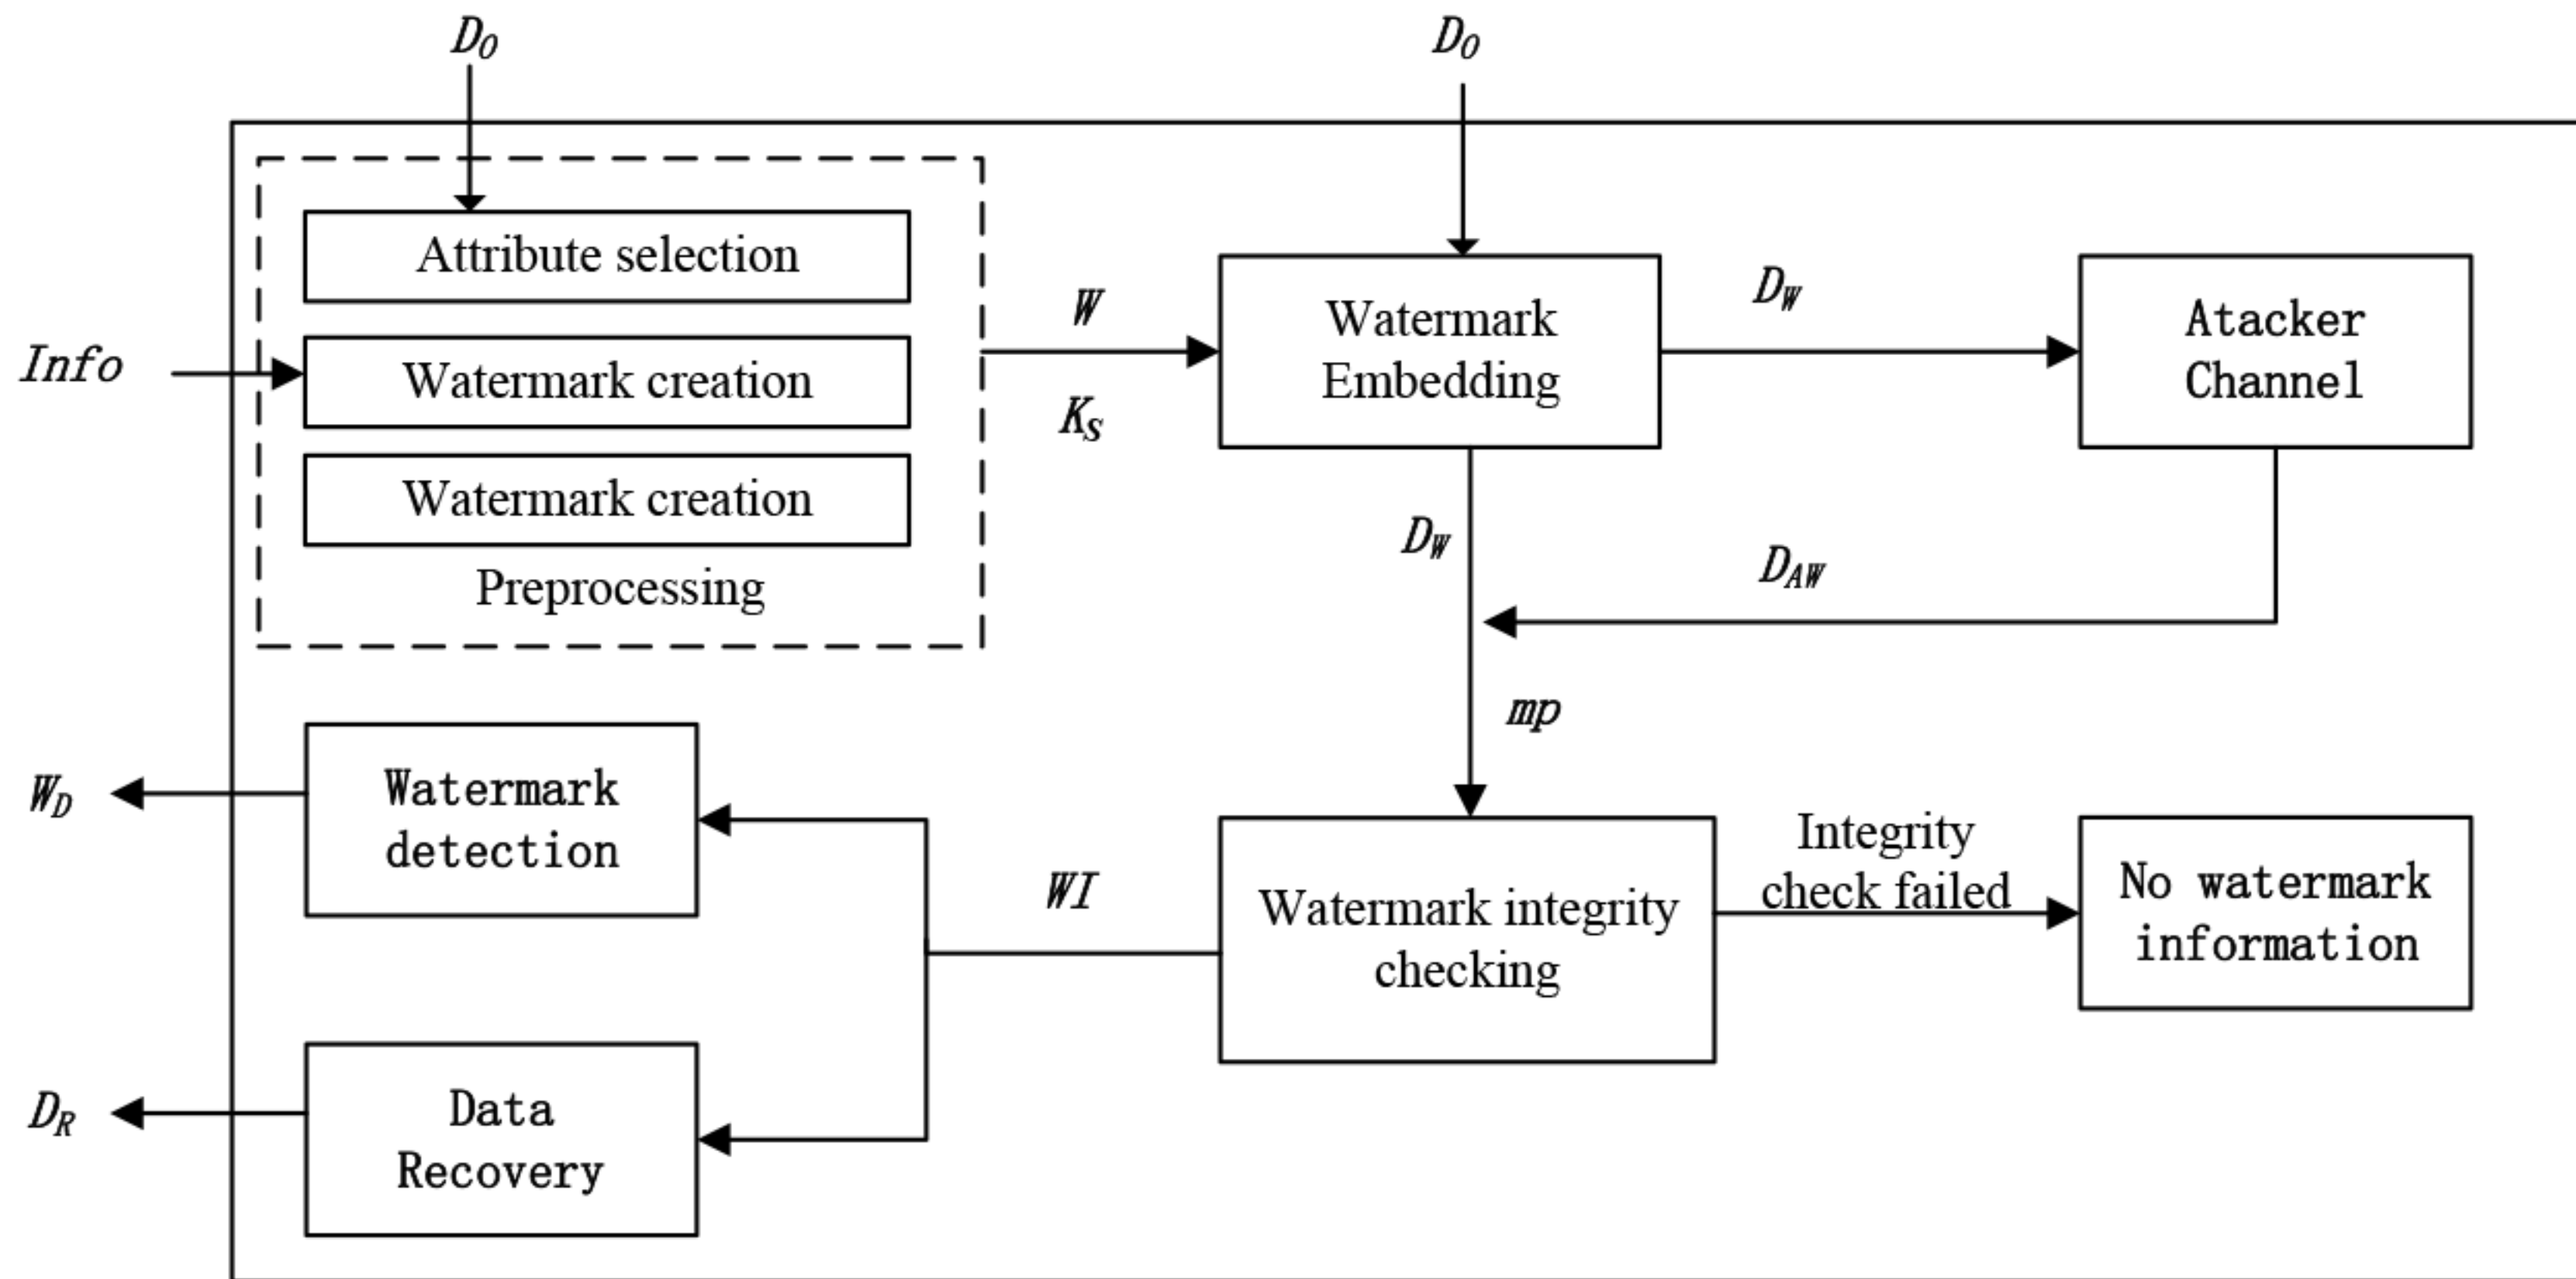

Supplement: Supplementary file 1 [file 4202648a18c217020734def4.zip]

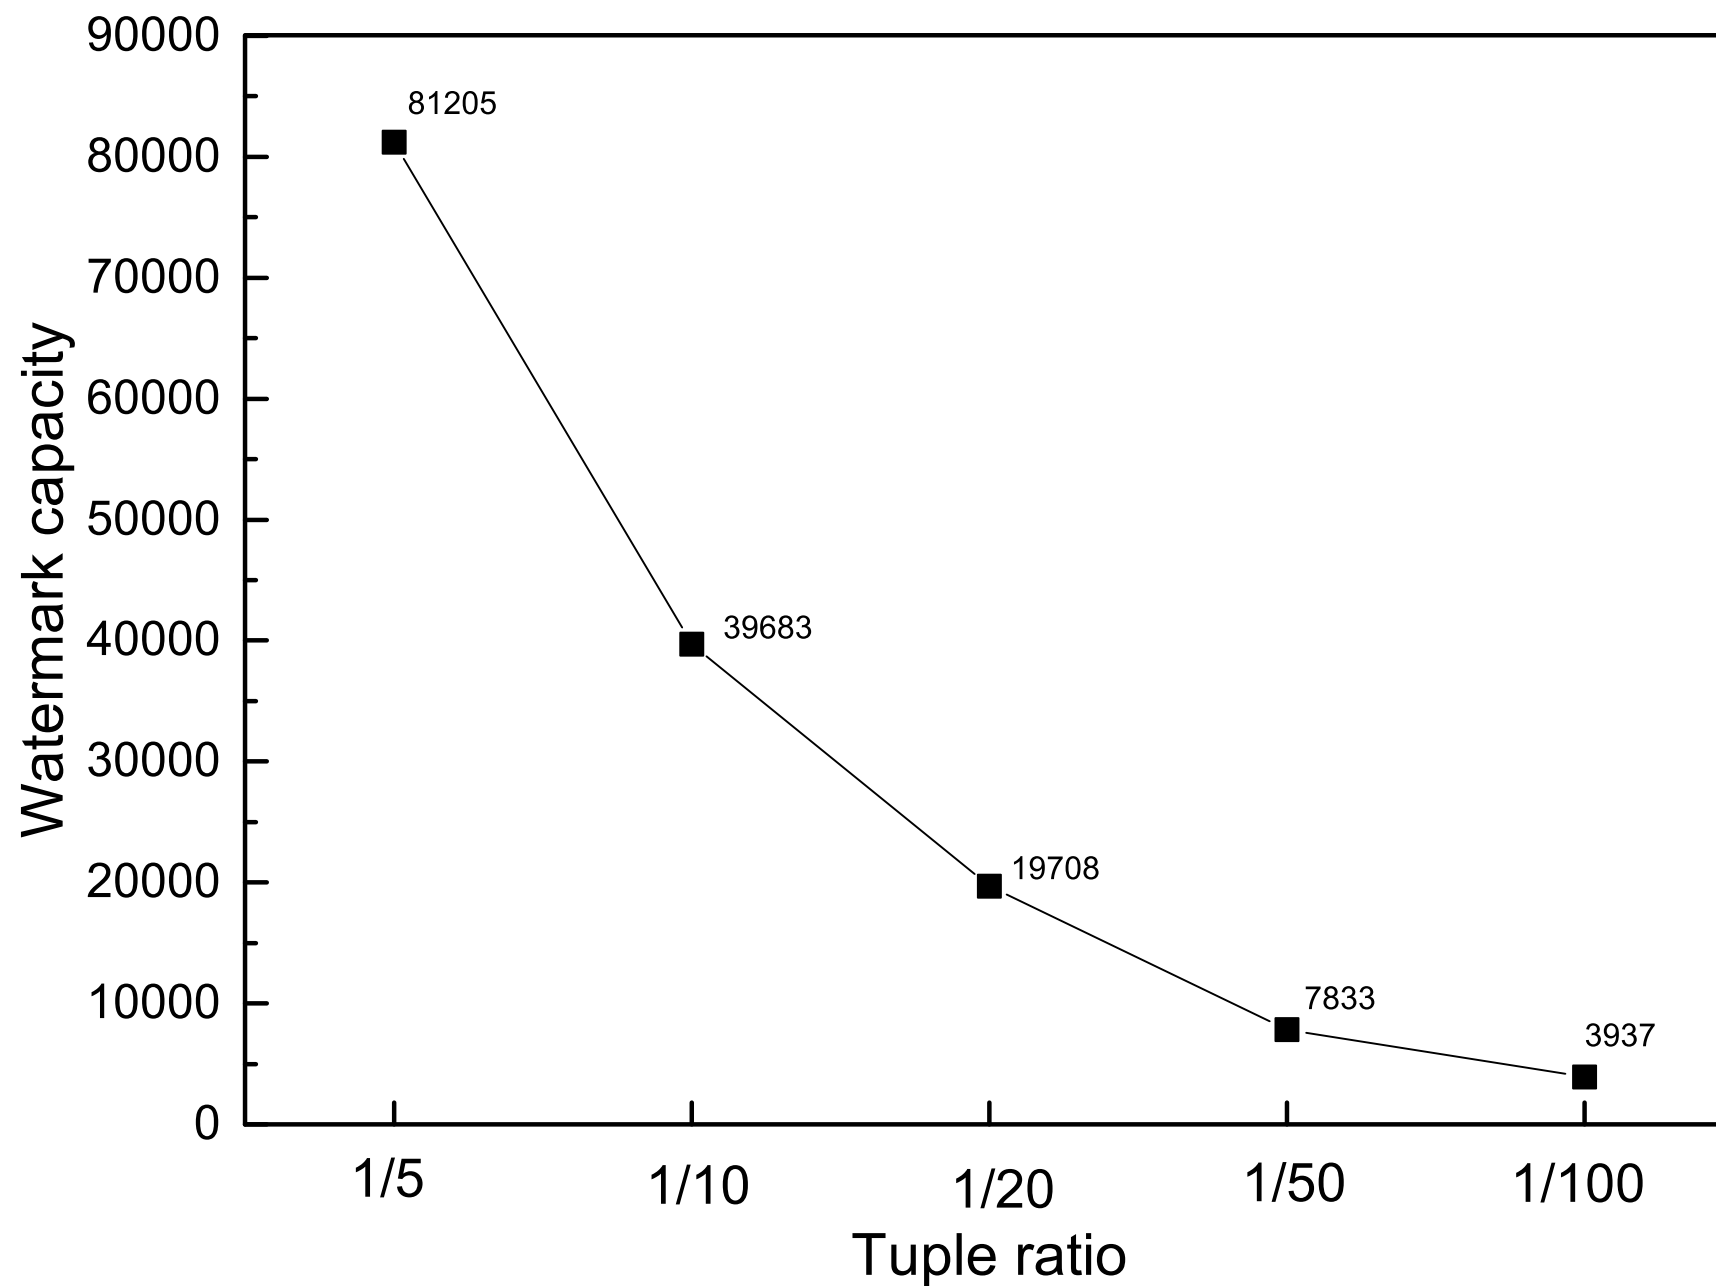

Supplement: Supplementary file 2 [file 4202648a18c217020734def4.zip]

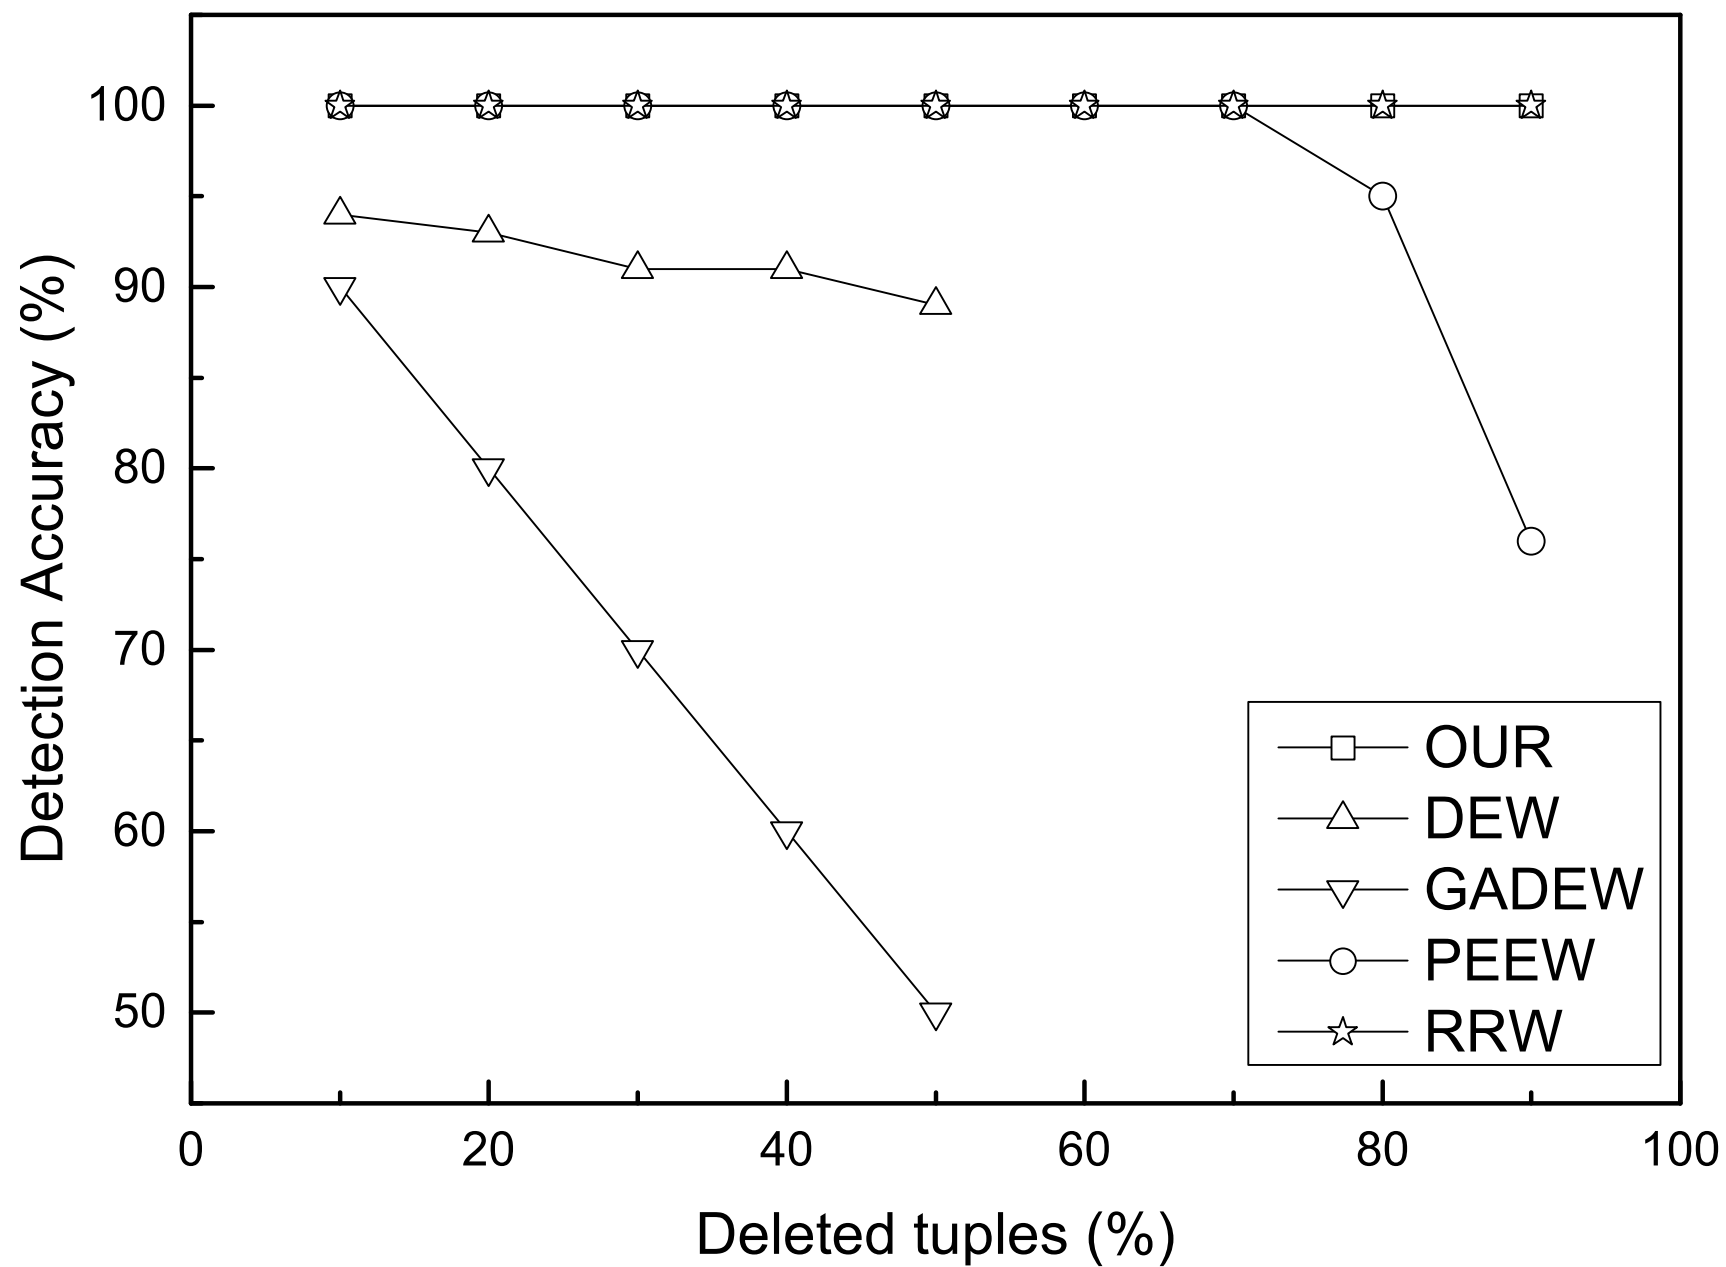

Supplement: Supplementary file 4 [file 4202648a18c217020734def4.zip]

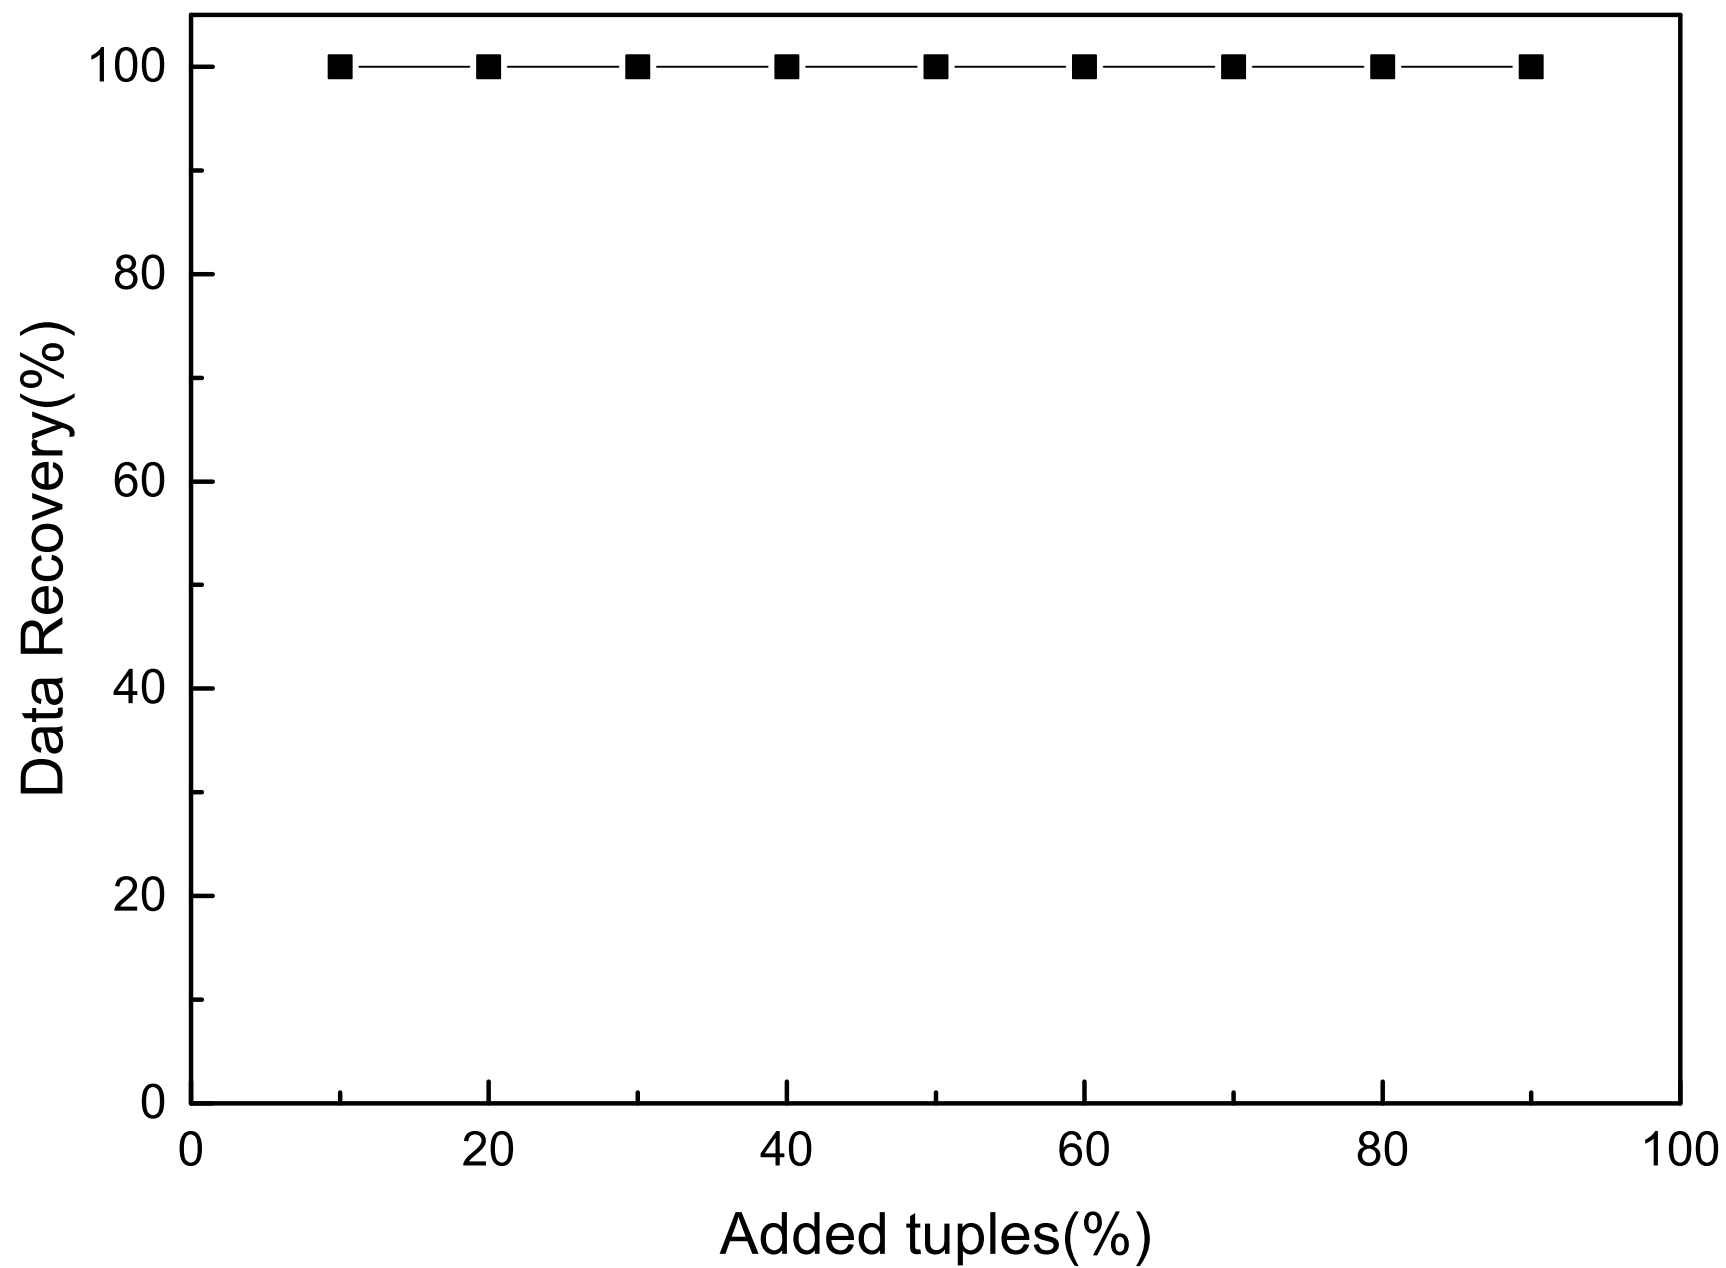

Supplement: Supplementary file 5 [file 4202648a18c217020734def4.zip]

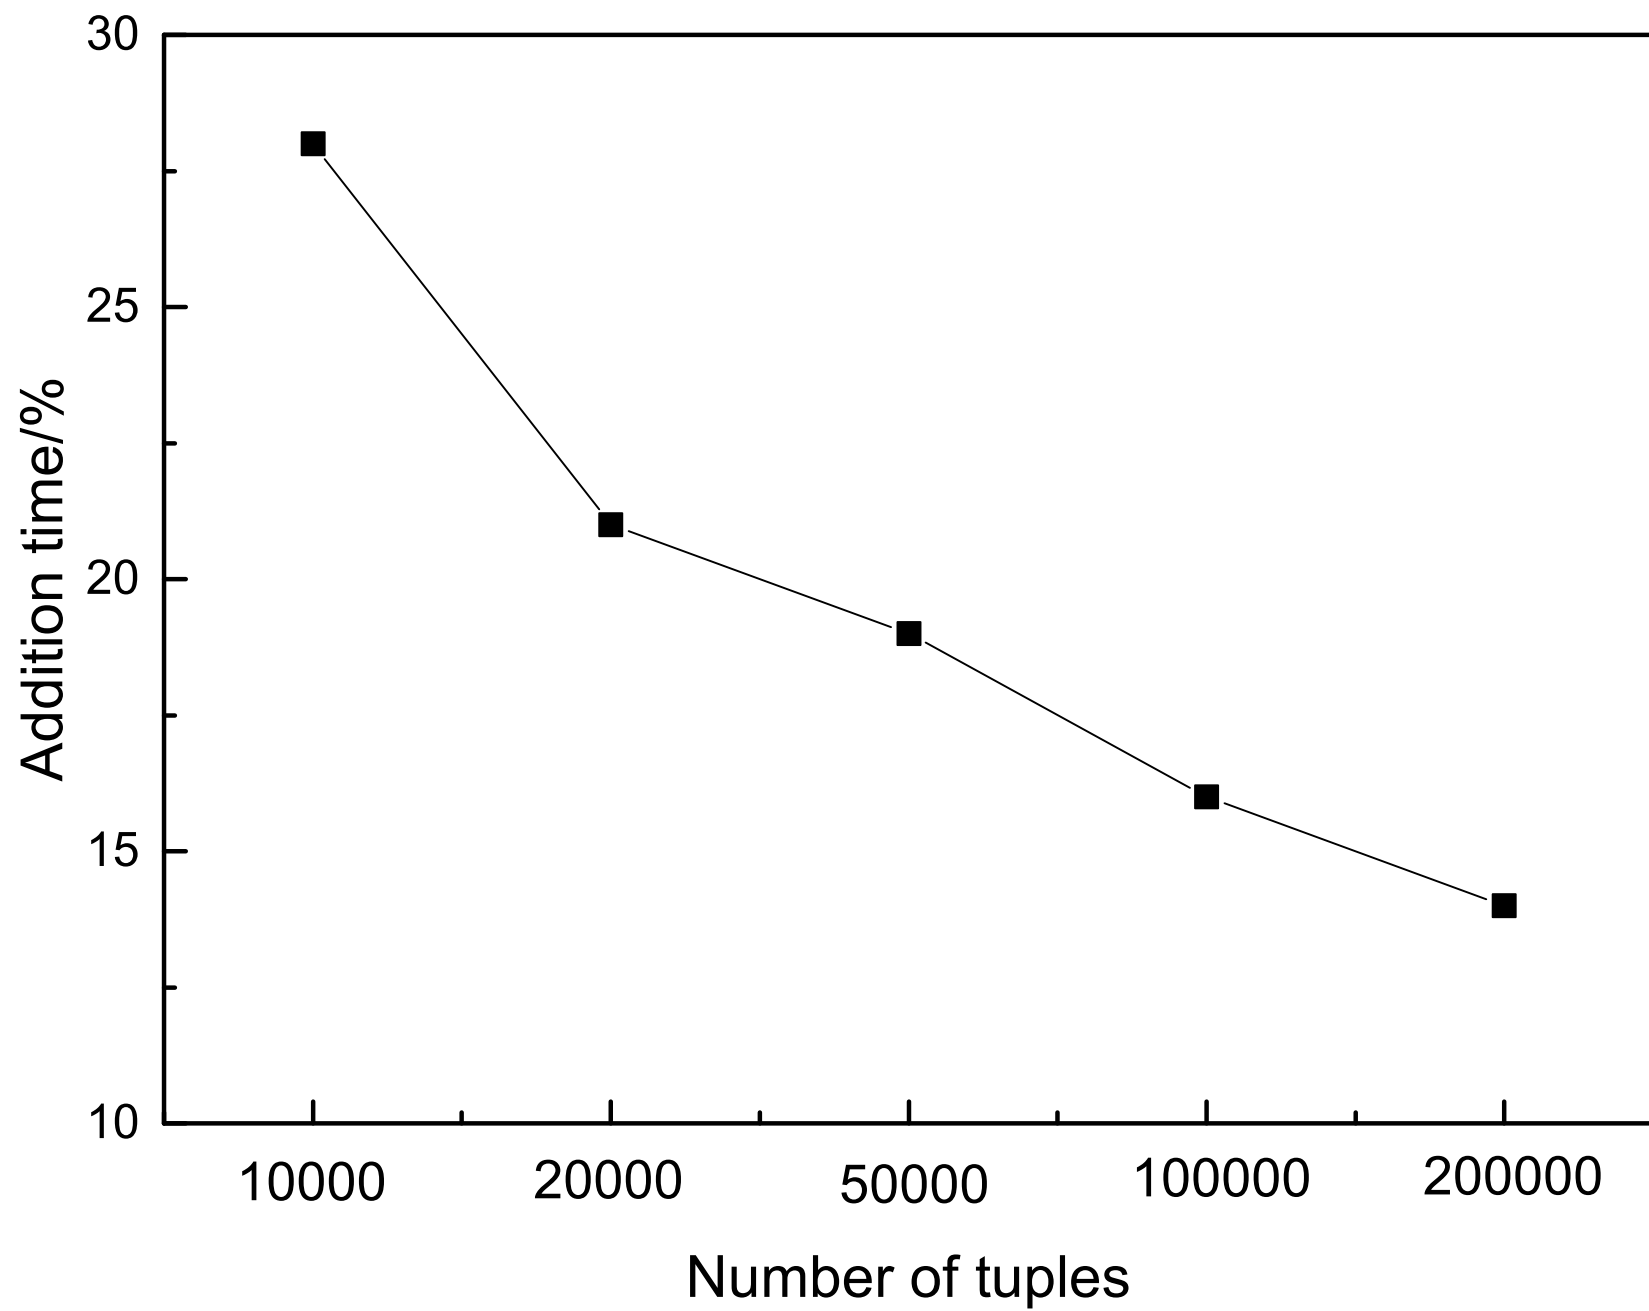

Supplement: Supplementary file 6 [file 4202648a18c217020734def4.zip]

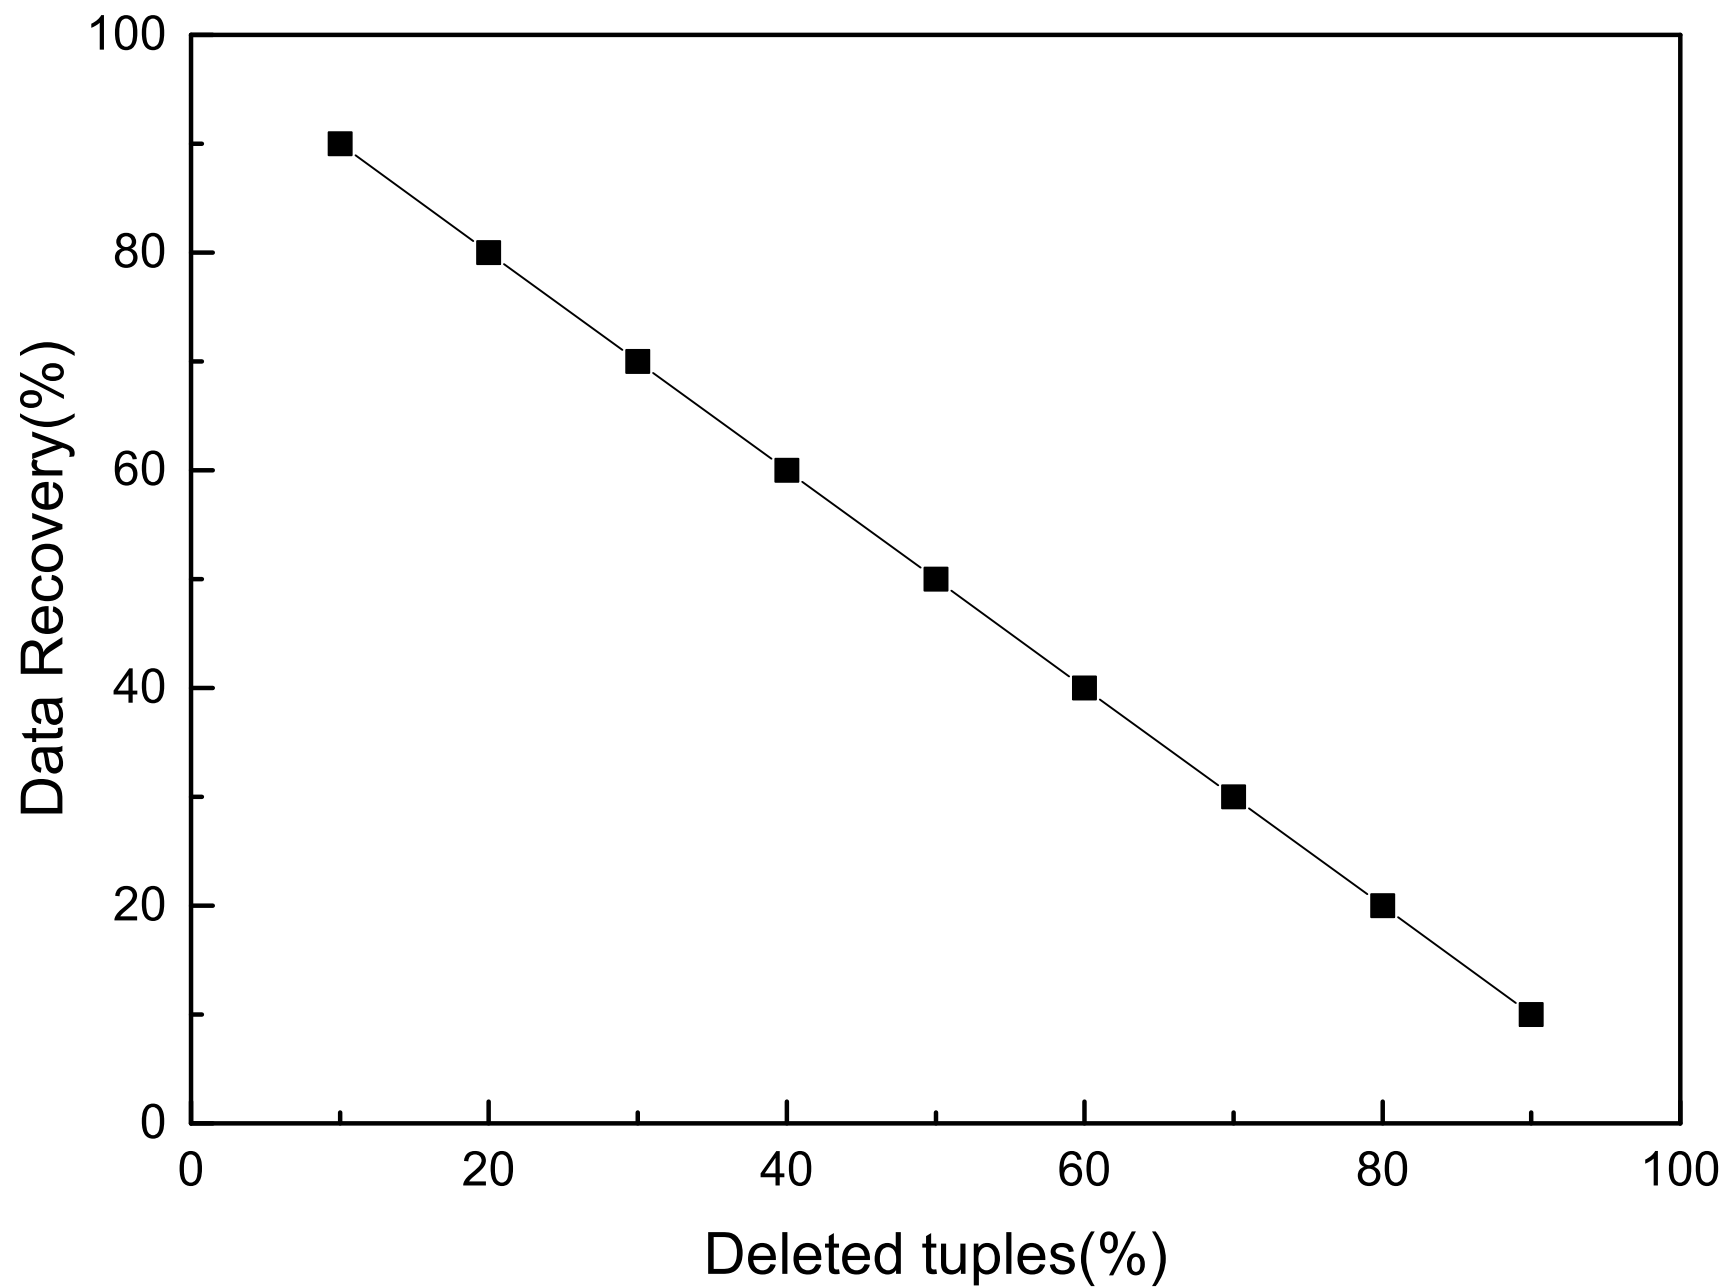

Supplement: Supplementary file 7 [file 4202648a18c217020734def4.zip]

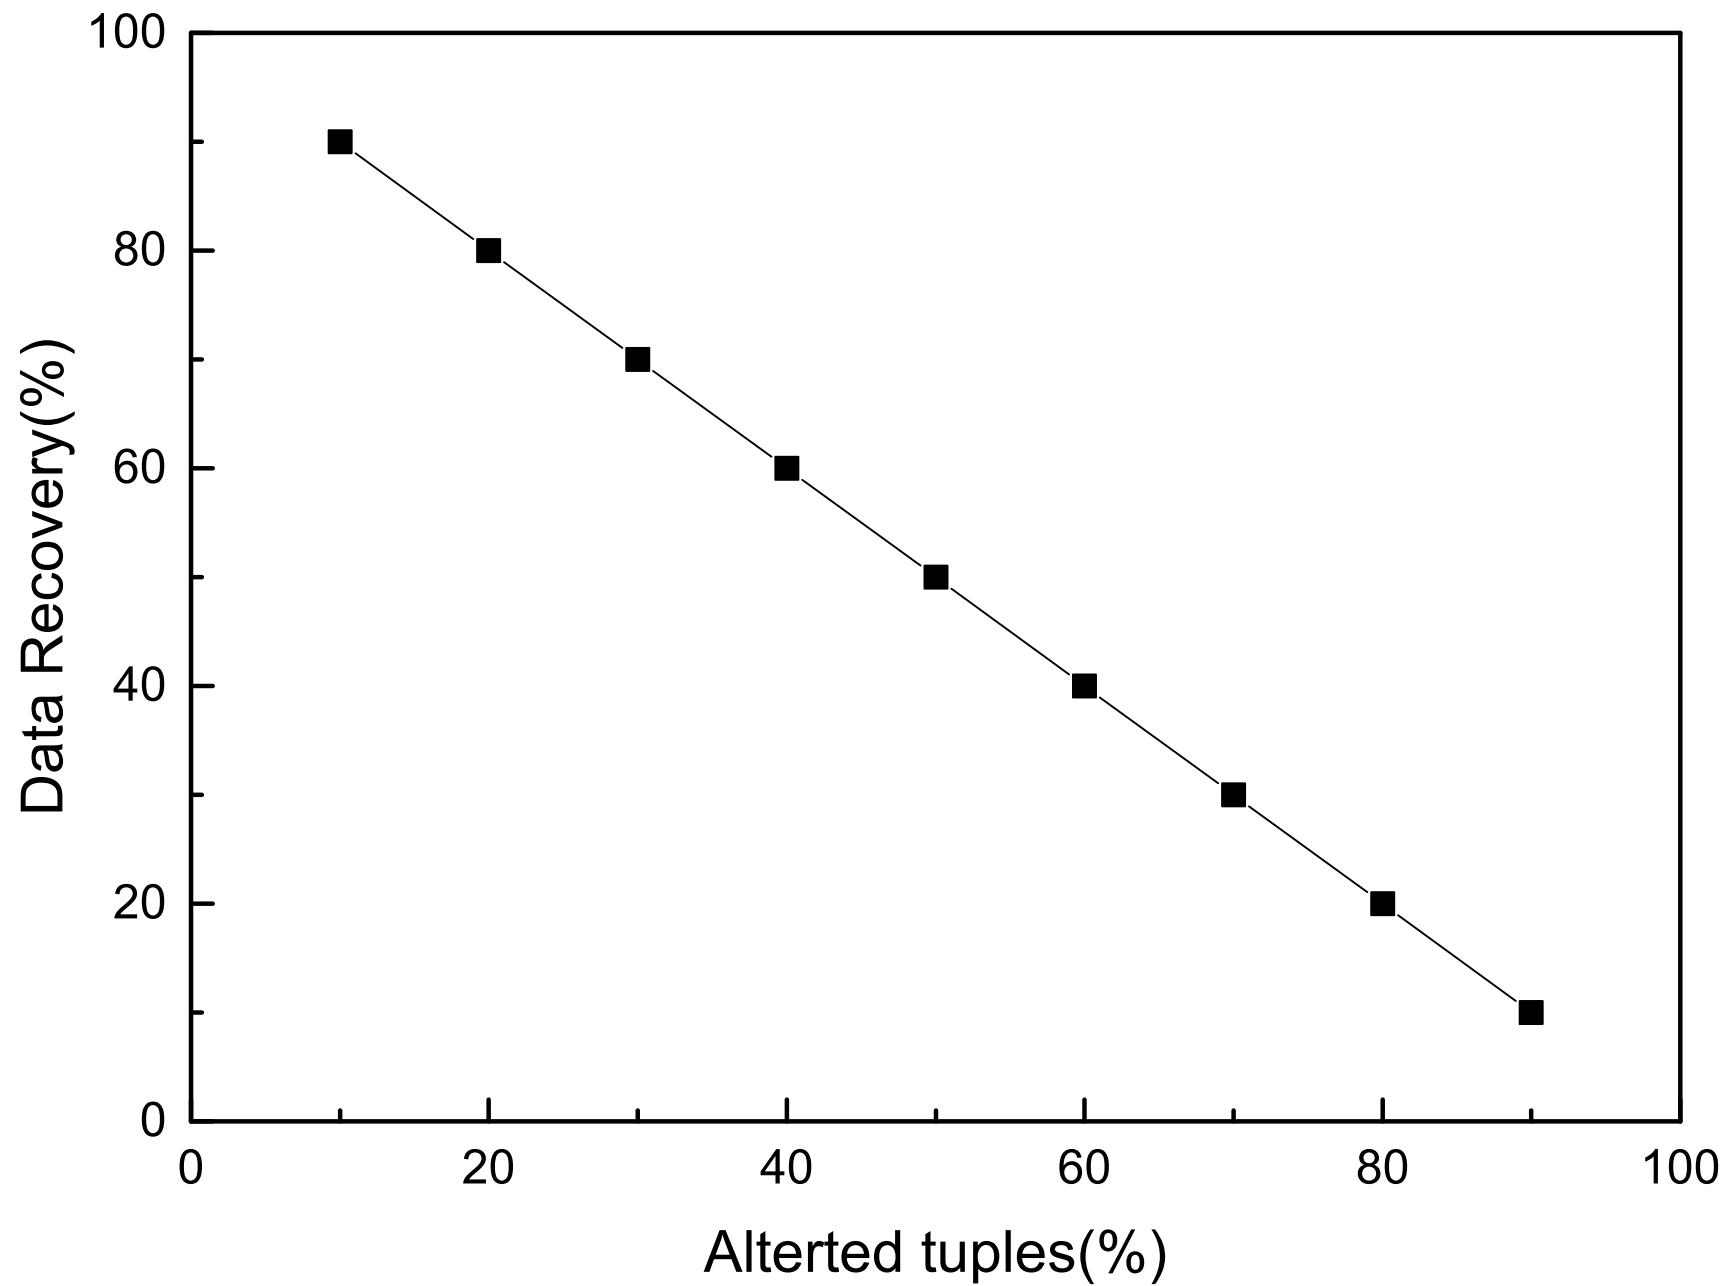

Supplement: Supplementary file 8 [file 4202648a18c217020734def4.zip]

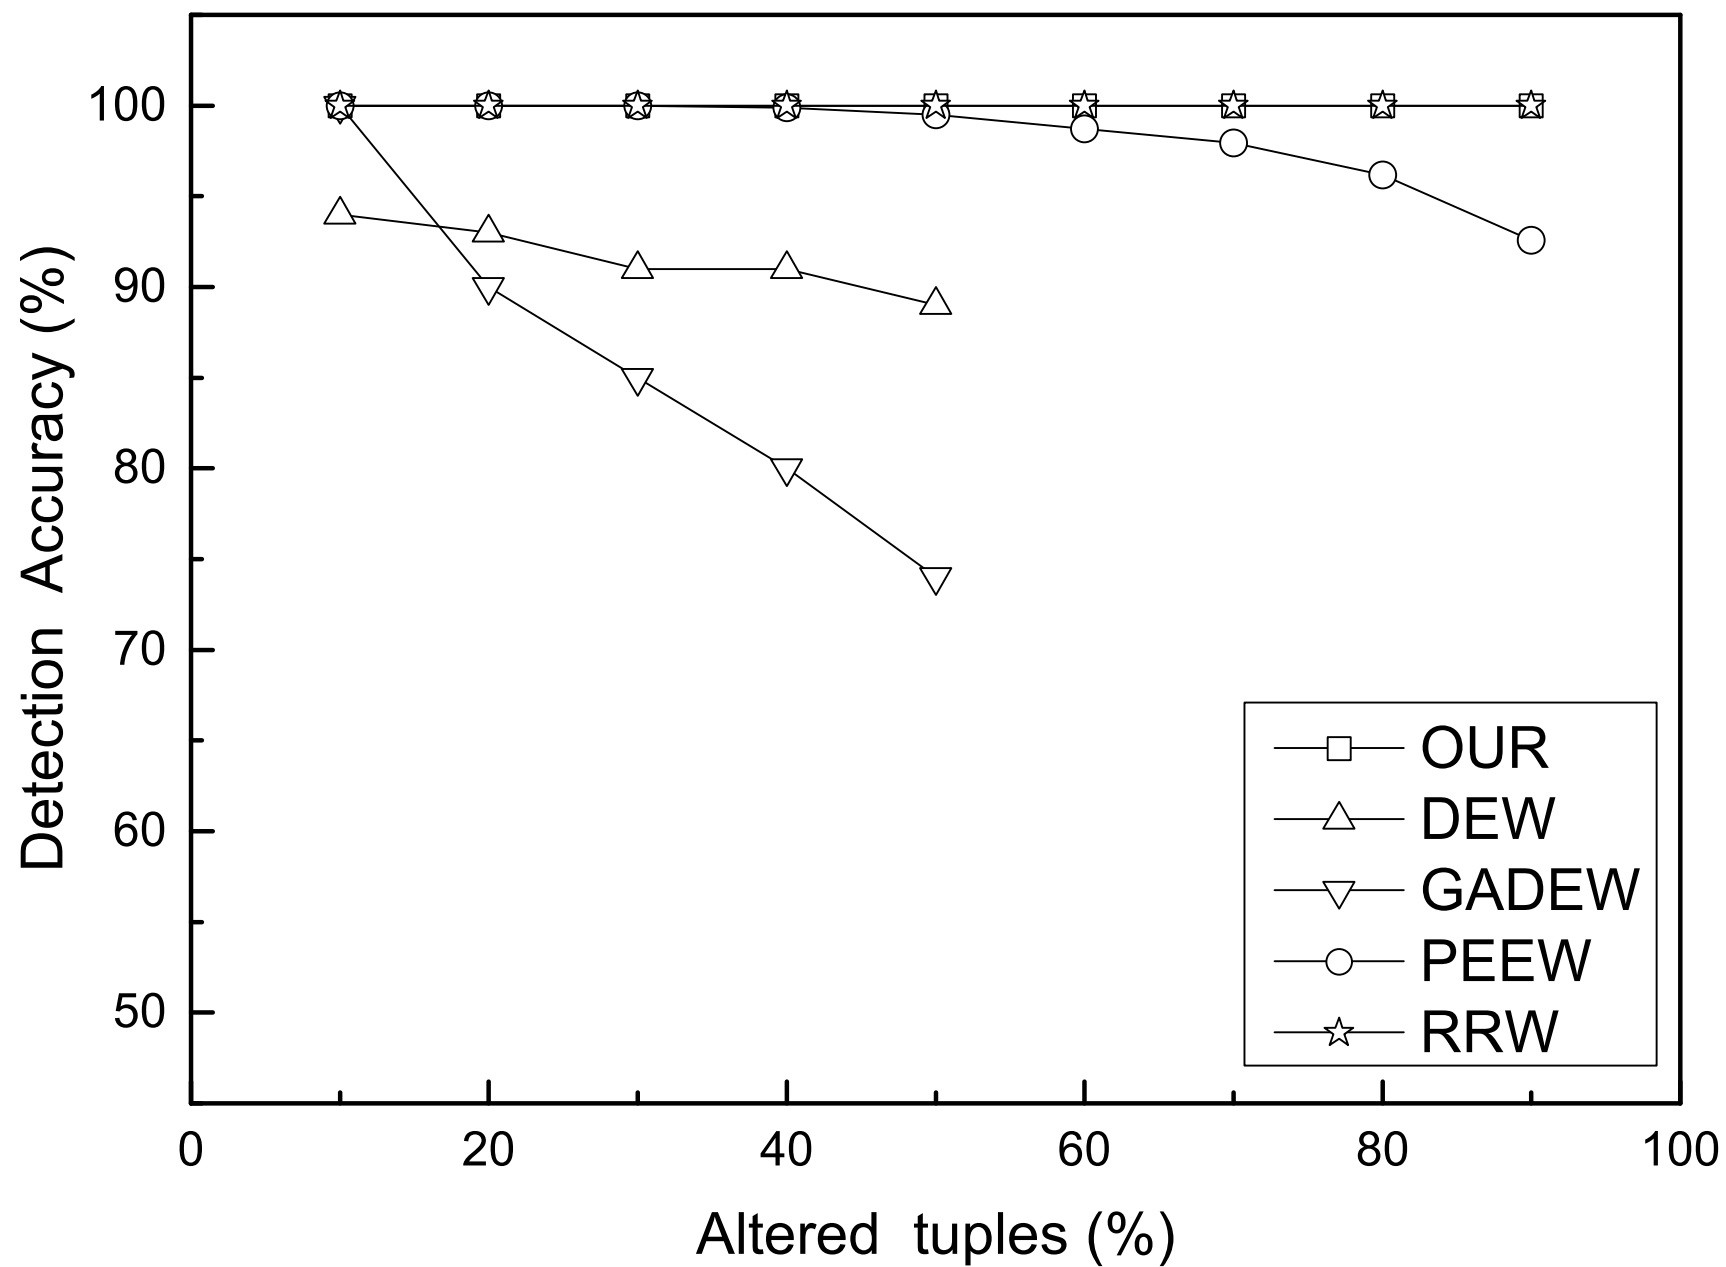

Supplement: Supplementary file 9 [file 4202648a18c217020734def4.zip]

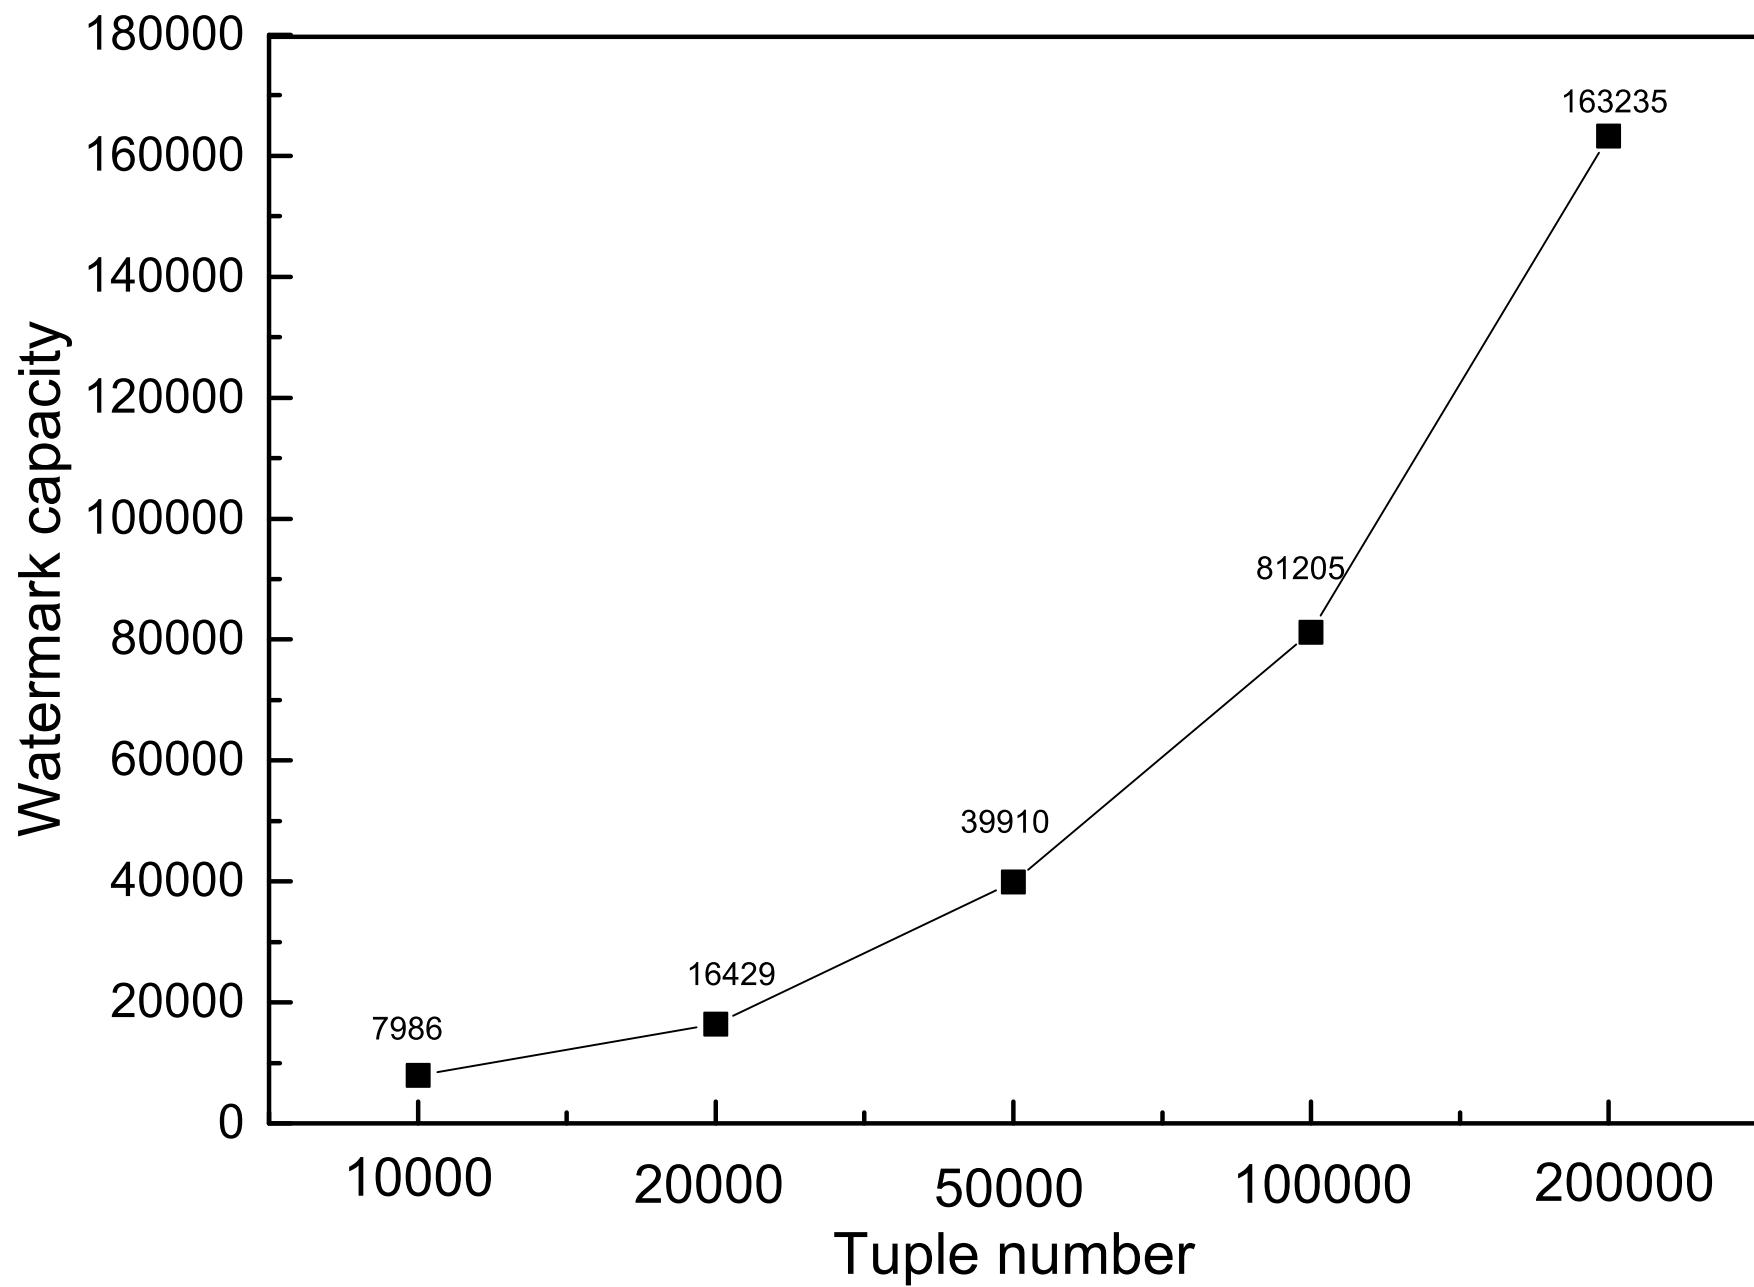

Supplement: Supplementary file 10 [file 4202648a18c217020734def4.zip]

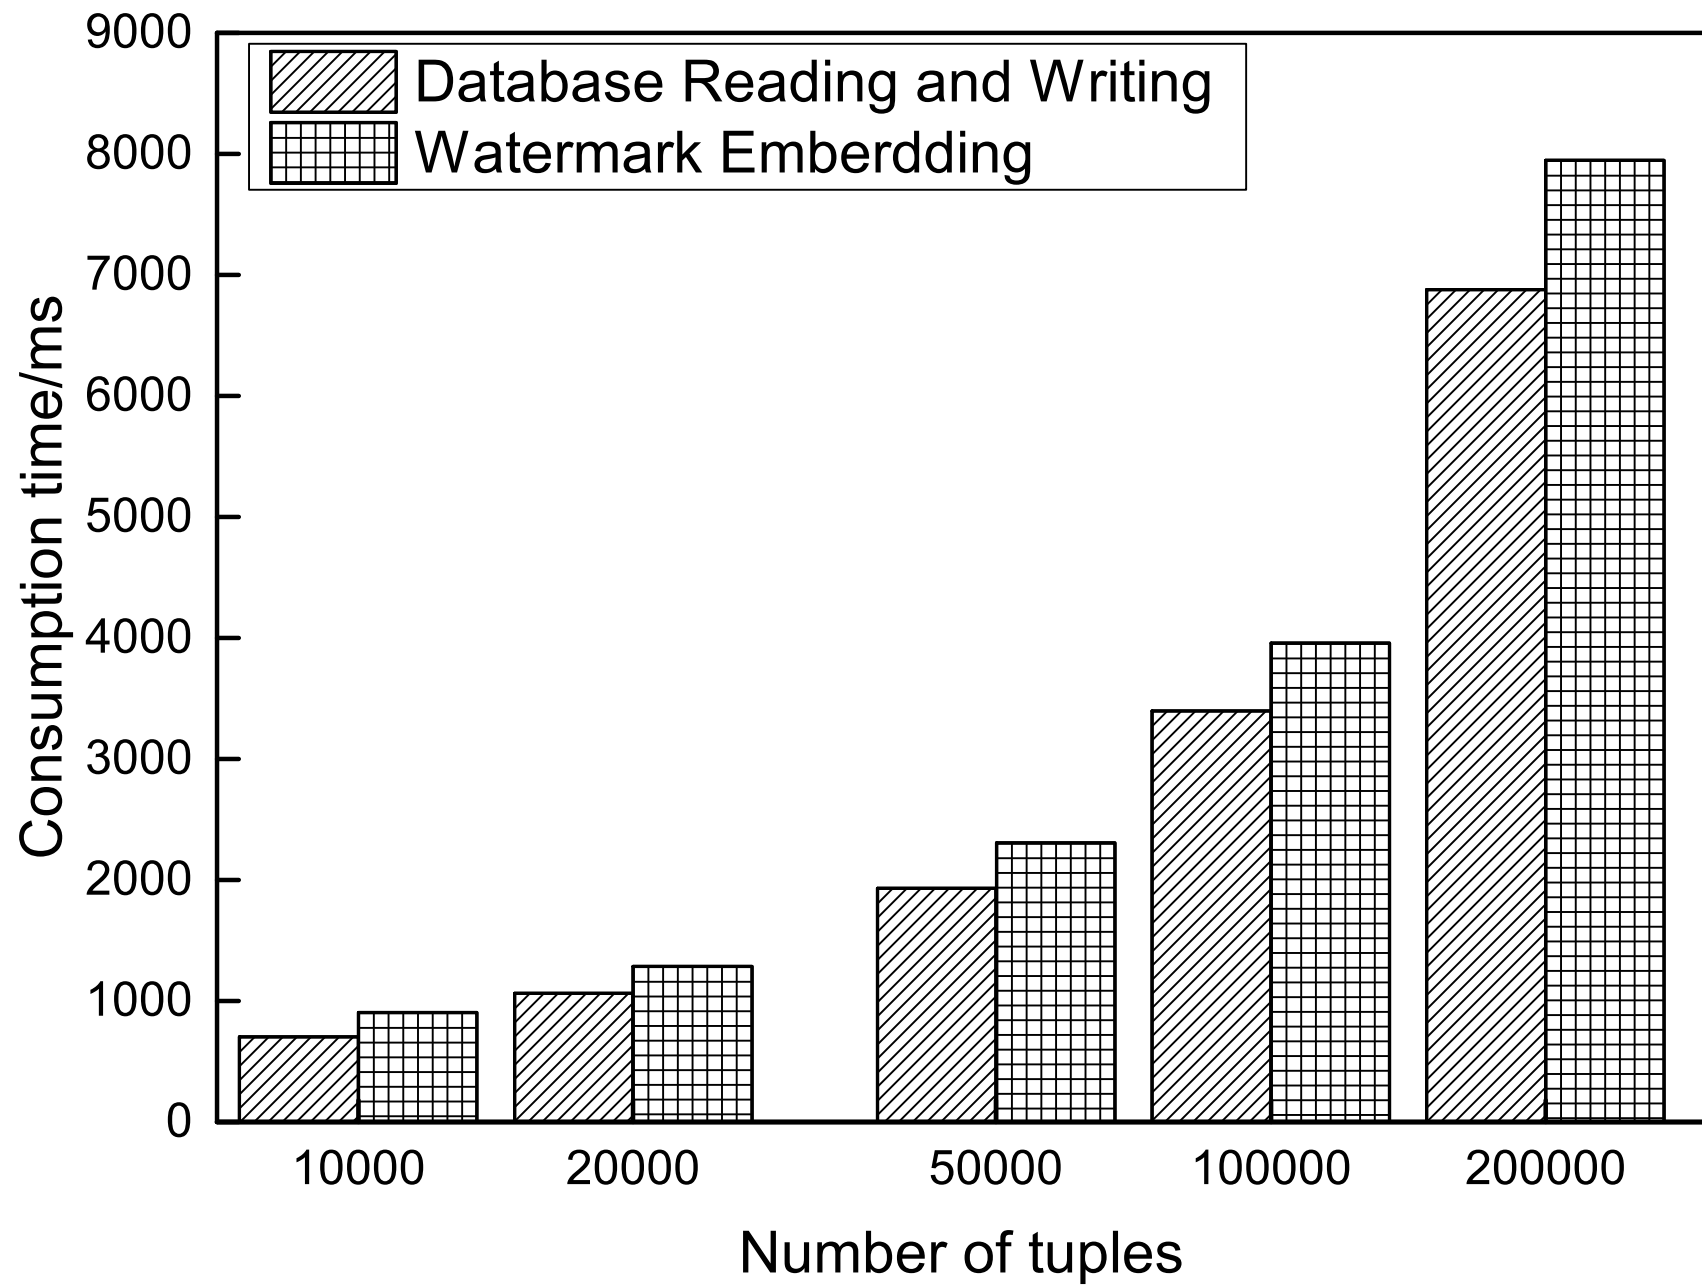

Supplement: Supplementary file 11 [file 4202648a18c217020734def4.zip]

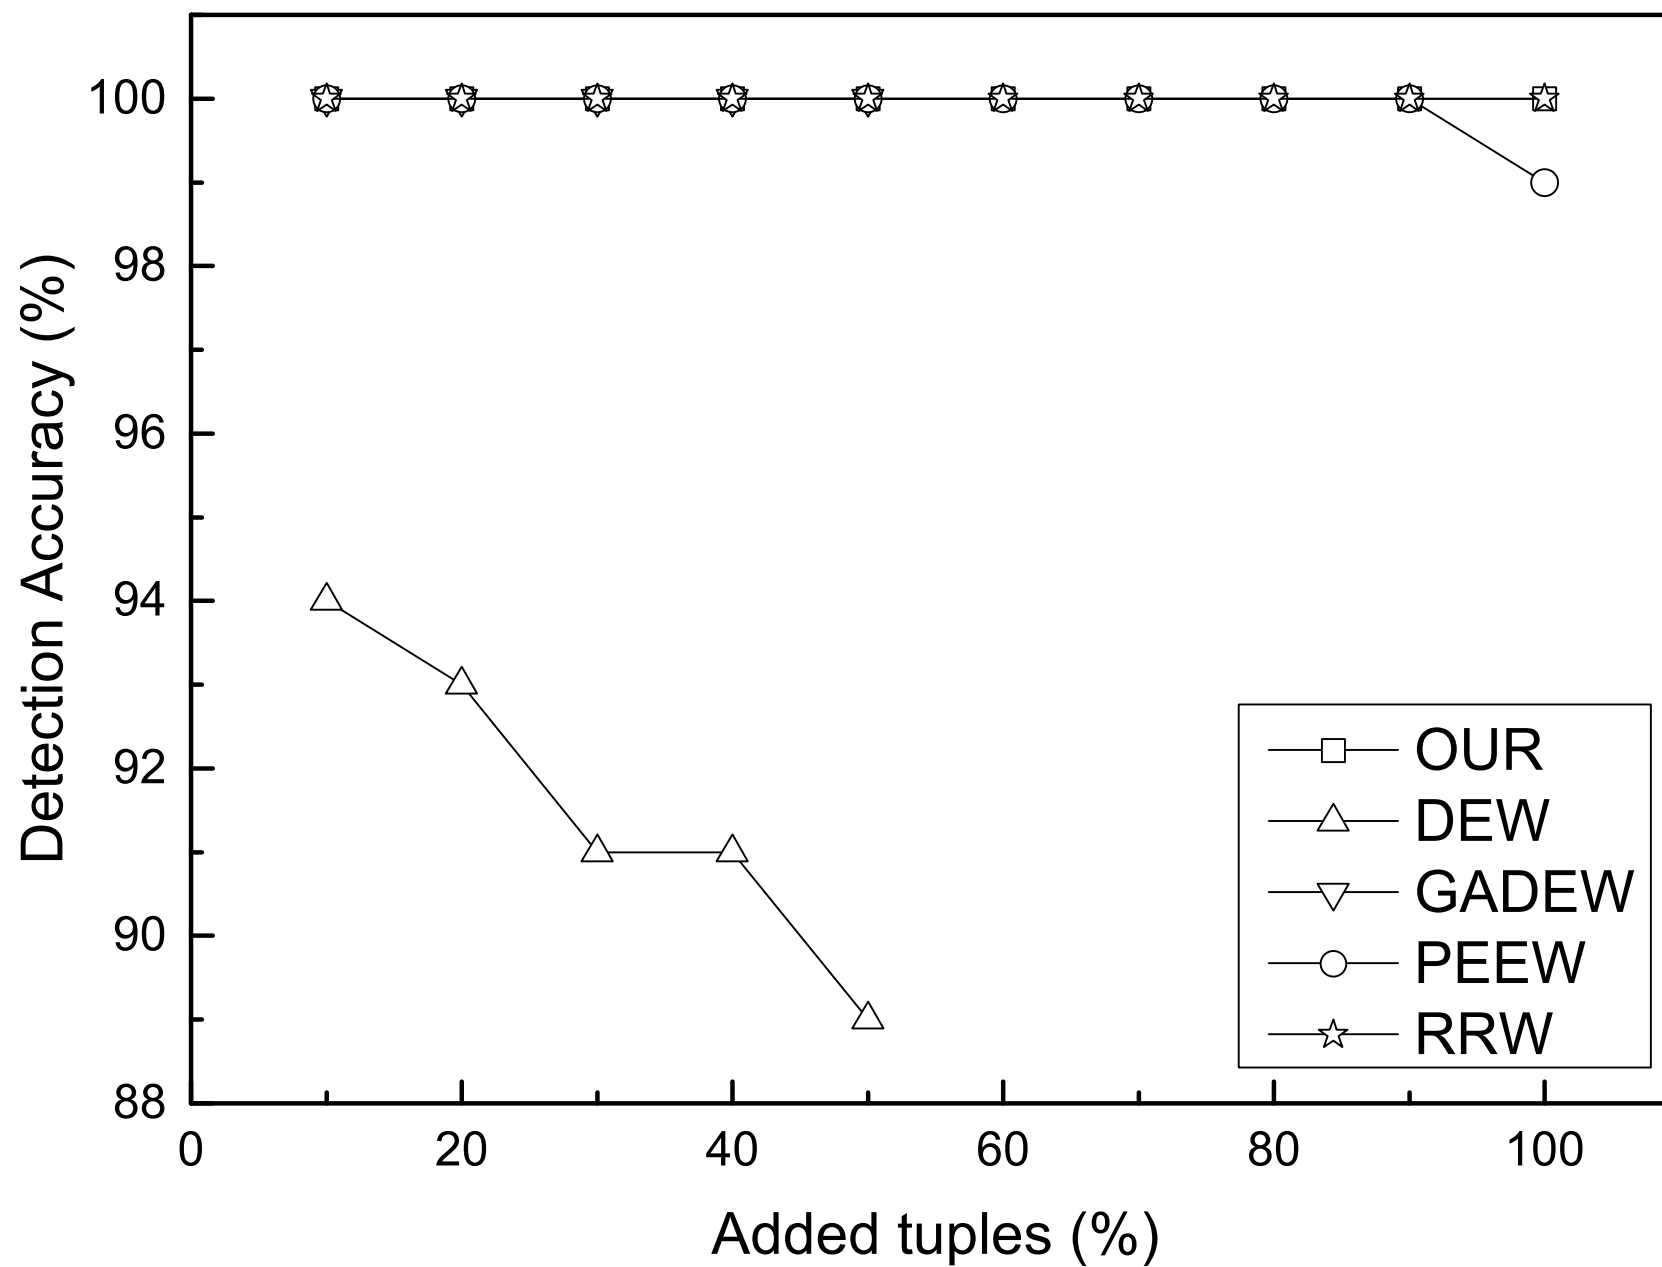

Supplement: Supplementary file 12 [file 4202648a18c217020734def4.zip]
